# Supplementary material for: Li trapping in nanolayers of cation ‘disordered’ rock salt cathodes
Source: Royal Society of Chemistry journal article supplement (doi:10.1039/d2ta04262b), 2022-01-01
Supplement: d2ta04262b1.pdf [file d2ta04262b1.pdf]

Supplementary Information for:

# Li trapping in nanolayers of cation 'disordered' rock-salt cathodes

Maria Diaz-Lopez,<sup>1\*</sup> Philip A. Chater,<sup>1</sup> Olivier Proux,<sup>2</sup> Yves Joly,<sup>2</sup> Jean-Louis Hazemann,<sup>2</sup> Pierre Bordet<sup>2</sup> and Valerie Pralong<sup>3</sup>

1. Diamond Light Source Ltd, Diamond House, Harwell Science and Innovation Campus, Didcot OX11 0DE, UK.
2. Grenoble Alpes Univ, CNRS, Inst Neel, 38000 Grenoble, France.
3. Normandie Univ, Ensicaen, Unicaen, CNRS, Crismat, 14000 Caen, France.

Email: [maria.diaz-lopez@diamond.ac.uk](mailto:maria.diaz-lopez@diamond.ac.uk)

Supplementary Figures:

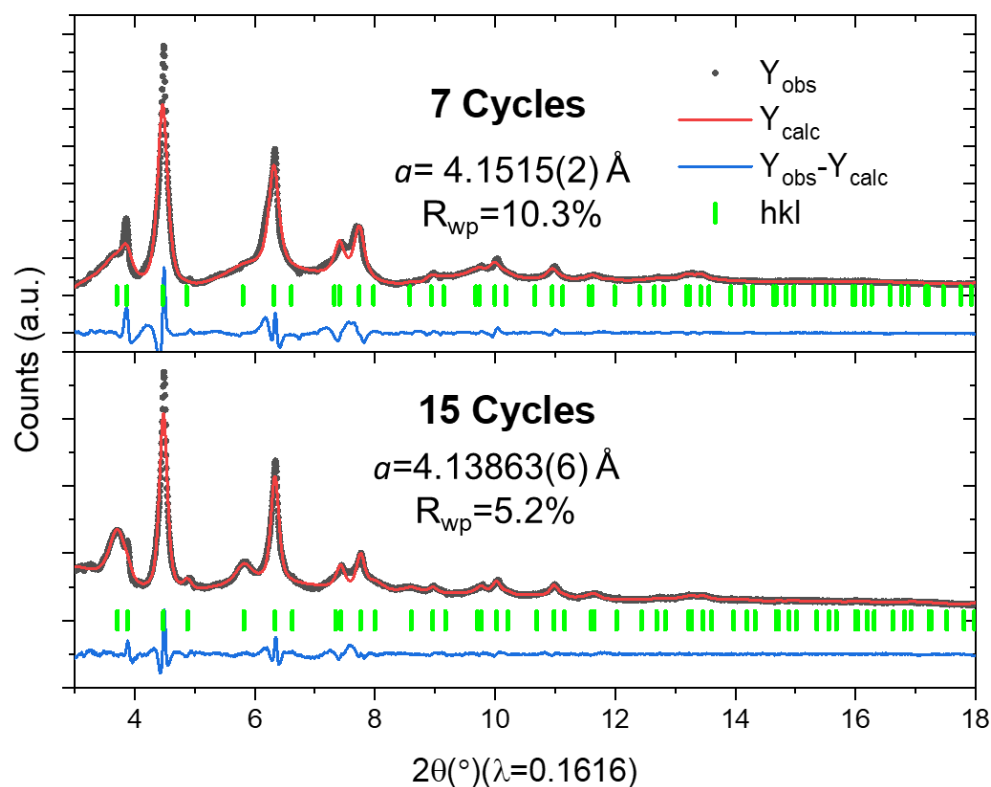

Figure S1. Rietveld refinements of ex-situ samples after 7 (top) and 15 (bottom) cycles using an hkl-dependent model.

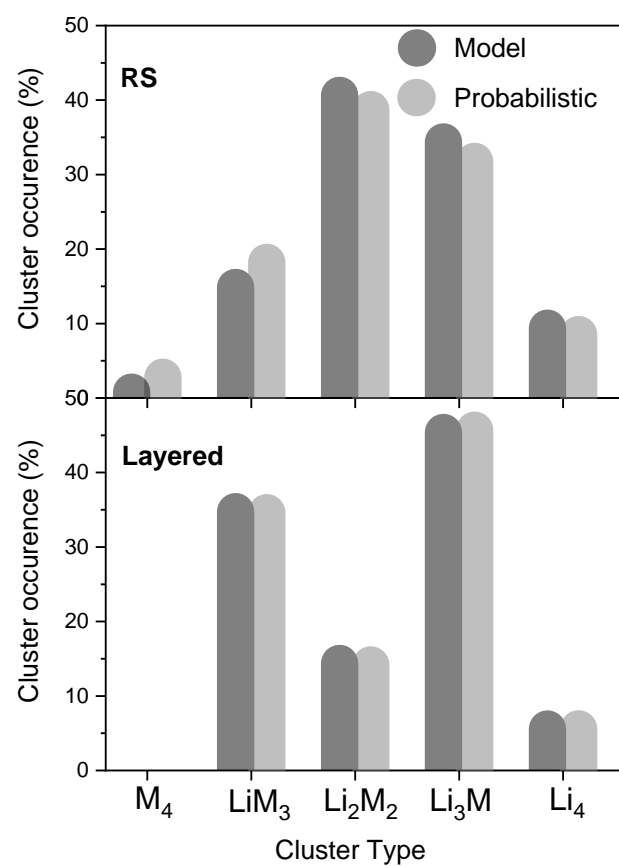

Figure S2. Comparison between the cluster occurrences in the models used in this study and the probabilistic limit.

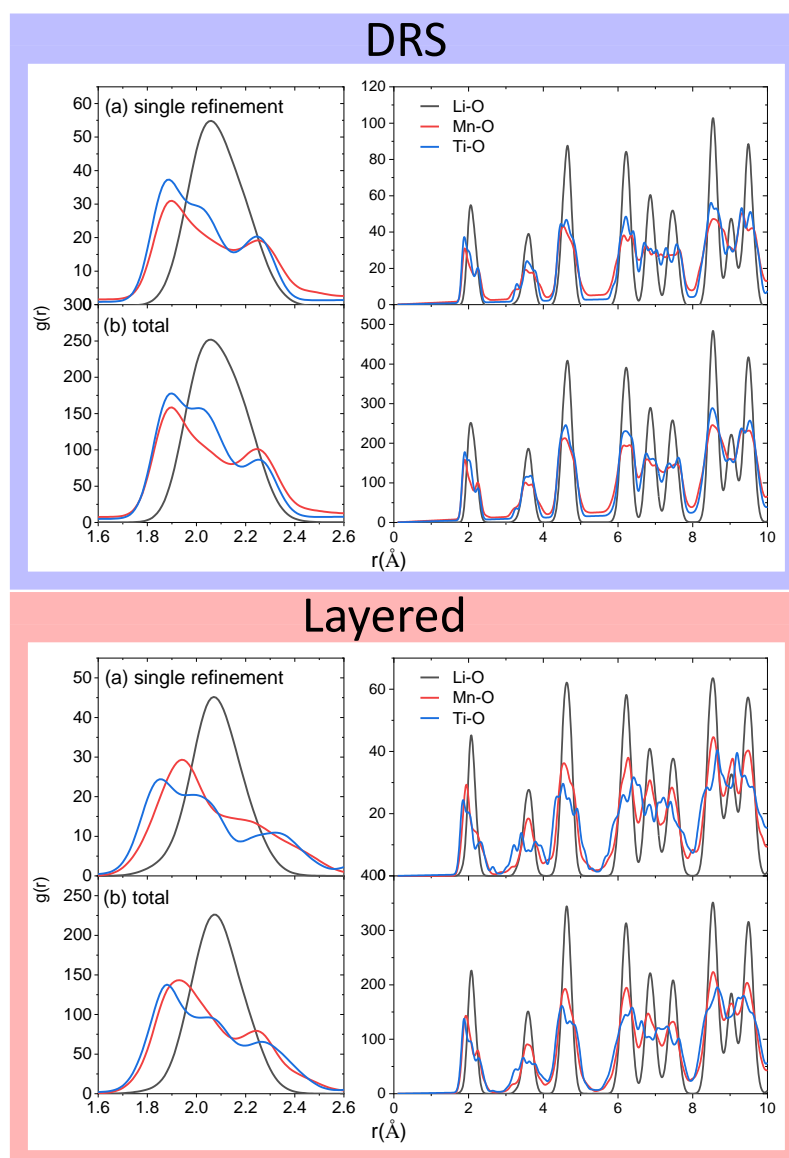

Figure S3. Partial atomic  $g(r)$ s of the DRS (top) and layered (bottom) models for a single refinement (a) and the sum of 5 (b).

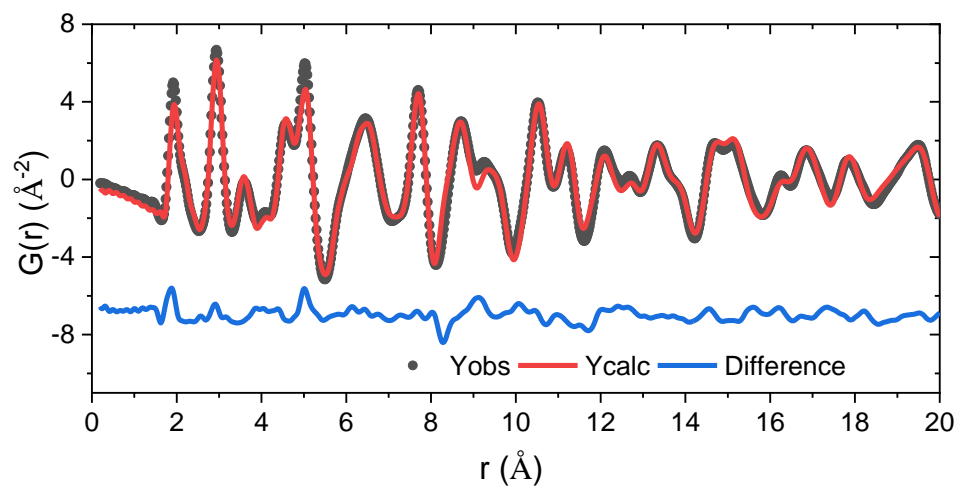

Figure S4. PDF fit of the disordered supercell showing the whole  $r$ -range used in the refinement.

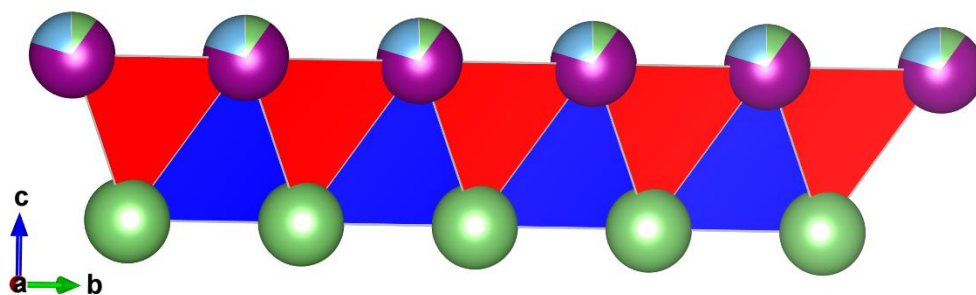

Figure S5. Representation of the two more predominant types of tetrahedral sites  $\text{LiM}_3$  (red) and  $\text{Li}_3\text{M}$  (blue) in the layered model. Green, purple and blue denote Li, Mn and Ti, respectively.

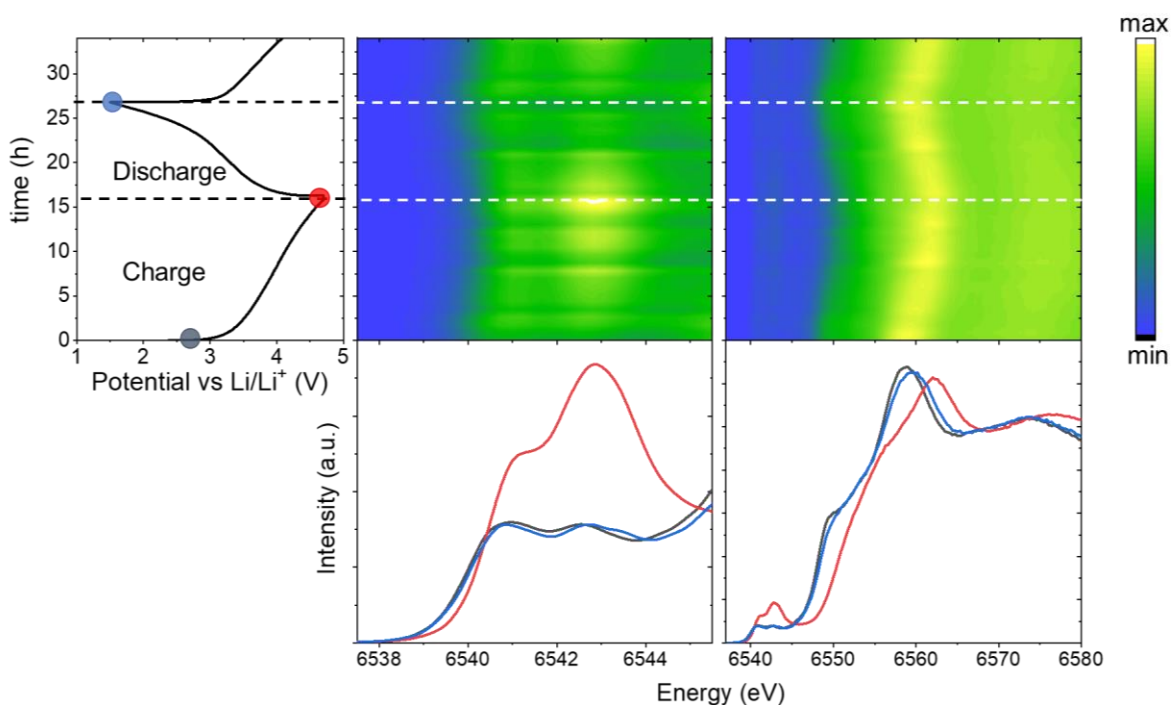

Figure S6. LMTO evolution with cycling characterized by HERFD-XANES. From left to right: electrochemical performance and contour plots of the magnified pre-edge region and HERFD-XANES. Bottom figures show superimposed spectra at highlighted potentials.

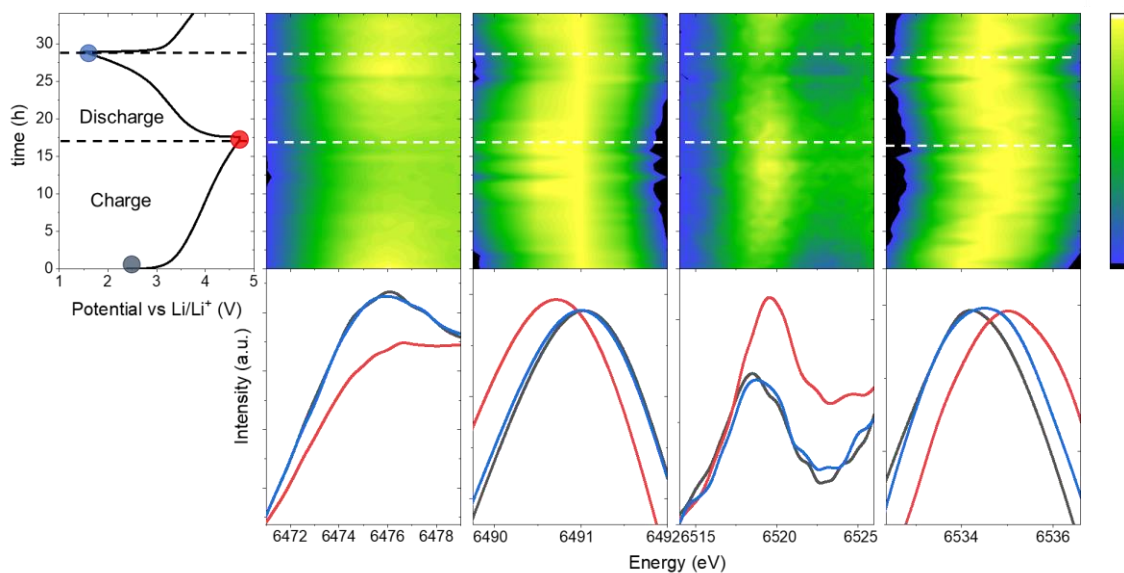

Figure S7. LMTO charge evolution with cycling characterized by operando XES. From left to right: electrochemical performance and contour plots of  $k\beta'$ ,  $k\beta_{1,3}$ ,  $k\beta''$  and  $k\beta_{2,5}$  transitions.

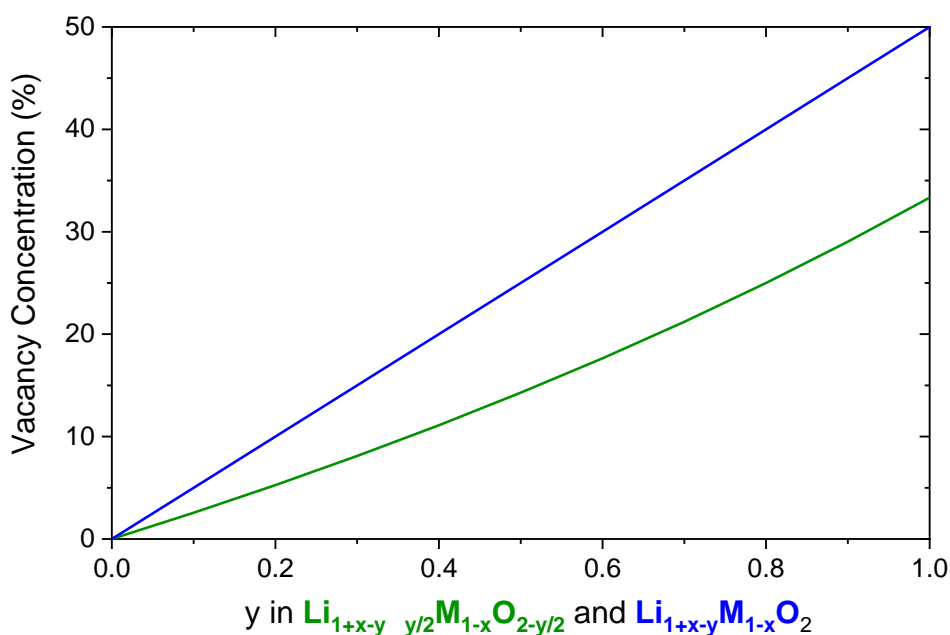

Figure S8. Cation vacancy concentration as a function of delithiation for Li-rich  $\text{Li}_{1+x}\text{M}_{1-x}\text{O}_2$  with (green) and without (blue) undergoing densification.

Lattice densification during delithiation in DRS decreases the concentration of cation vacancies in the material in the charged state following the reaction:

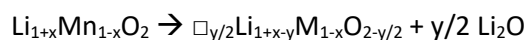

Note  $\text{Li}_2\text{O}$  is not detected as a secondary phase, as it forms  $\text{Li}^+$  and oxide ions. The oxide ions have been reported to undergo redox to form molecular oxygen which can either be released at the surface of the particles or trapped in 'cavities' resulting from the clustering of cation vacancies.<sup>[1–3]</sup> Other hypothesis include the formation of peroxides that can be stabilized by the liquid electrolyte at the surface of the cathode material.<sup>[4]</sup>

Lattice densification is not an irreversible process in DRS.<sup>[5]</sup> The  $\text{O}_2$  molecules are cleaved on discharge reforming  $\text{O}^{2-}$ , this drives in turn the migration of transition metals into new vacancies and the reincorporation of  $\text{Li}^+$ -ions on discharge. During such lattice redistribution, layered domains continue to grow as shown in Figure 2.c.  $\text{M}_3\square$  sites within layered domains could become disconnected from the pathways for  $\text{Li}^+$ -reincorporation rendering cation vacancies that can no longer be accessed by  $\text{Li}^+$ . The trapping of cation vacancies in the layered domains could explain the irreversible oxidation to  $\text{Mn}^{4+}$  during the first charge observed by XES.

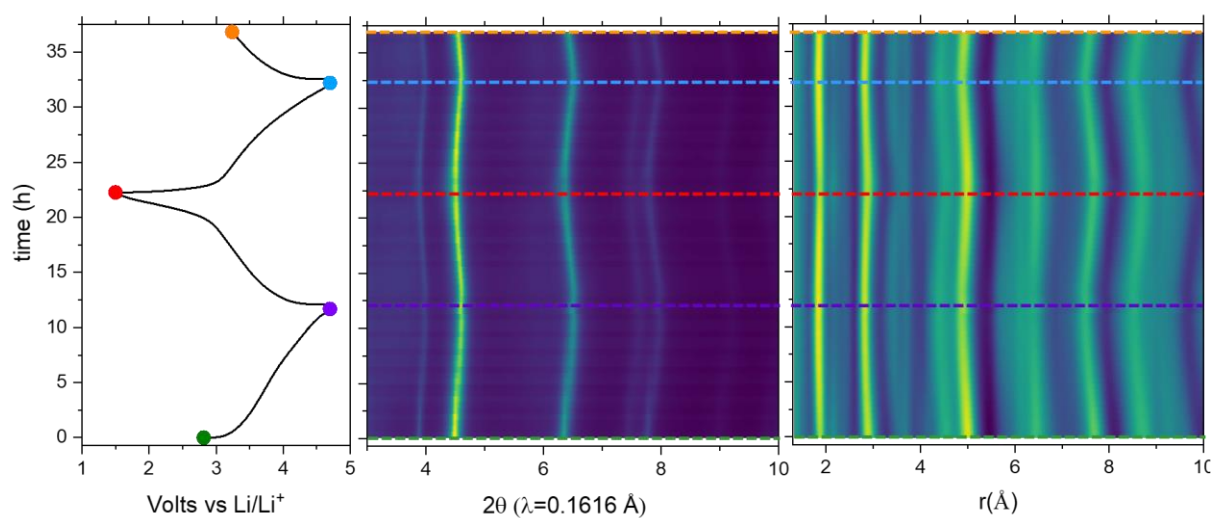

Figure S9. Operando LMTO evolution by total scattering. From left to right: electrochemical performance, Bragg and PDF data. The data at the start, end and potential limits is highlighted by filled circles and dashed lines.

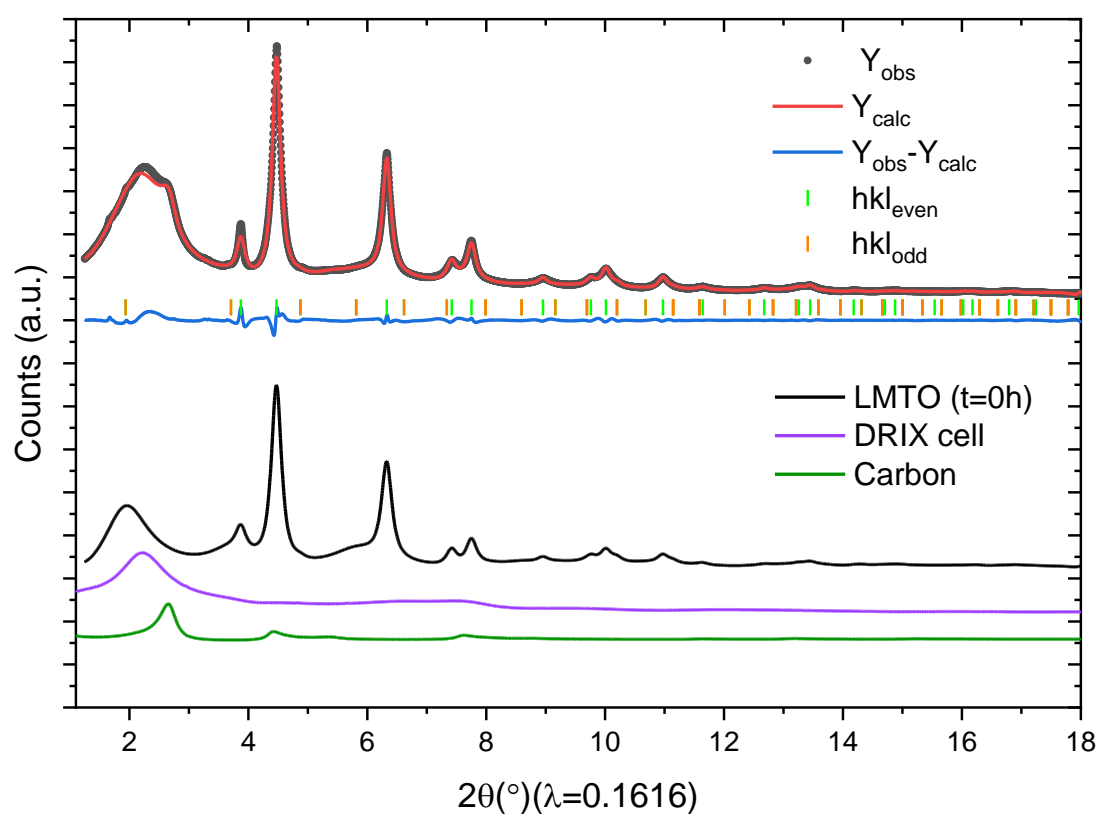

Figure S10. Rietveld refinements of the in-situ sample at  $t=0h$  showing the DRIX cell and Carbon backgrounds included in the fit..

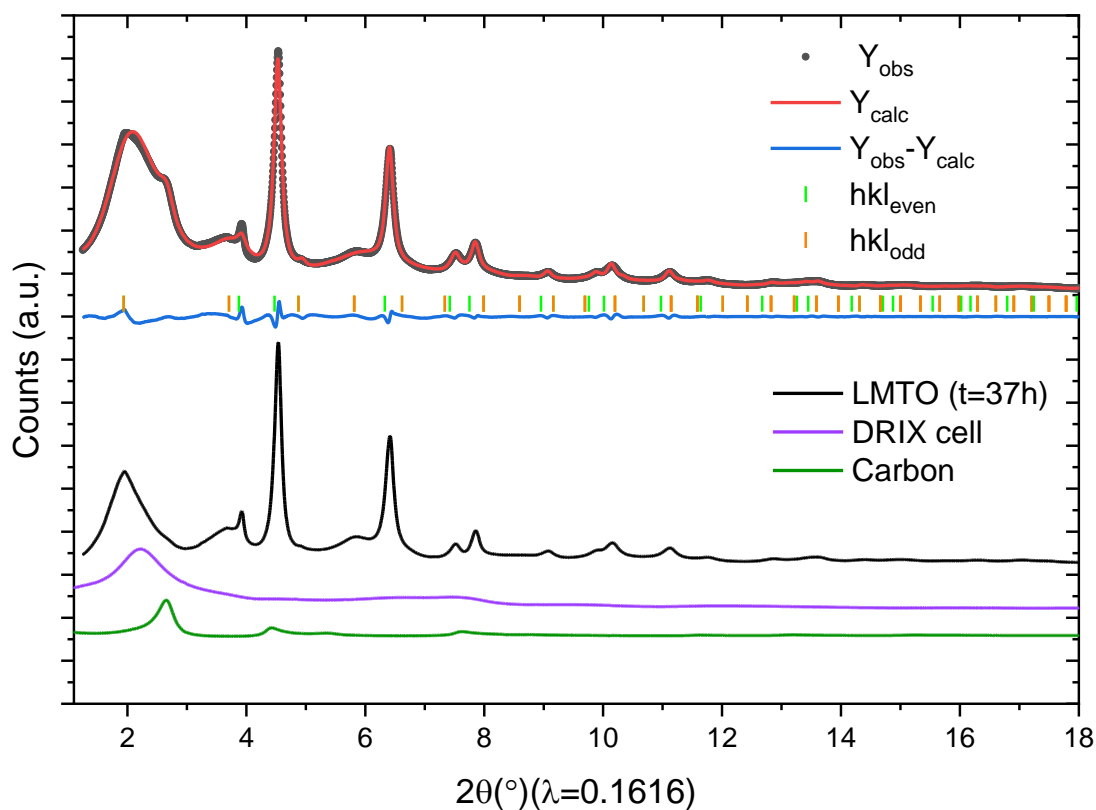

Figure S11. Rietveld refinements of the in-situ sample at  $t=37h$  showing the DRIX cell and Carbon backgrounds included in the fit.

## References:

- [1] R. Sharpe, R. A. House, M. J. Clarke, D. Fo, J. Marie, G. Cibir, K. Zhou, H. Y. Playford, P. G. Bruce, M. S. Islam, *J. Am. Chem. Soc.* **2020**.
- [2] R. A. House, H. Y. Playford, R. I. Smith, I. Griffiths, K. Zhou, P. G. Bruce, *Energy Environ. Sci.* **2021**.
- [3] R. A. House, U. Maitra, M. A. Pérez-osorio, J. G. Lozano, L. Jin, J. W. Somerville, L. C. Duda, A. Nag, A. Walters, K. Zhou, M. R. Roberts, P. G. Bruce, *Nature* **2020**, 577, 502.
- [4] J. Hong, H. Lim, M. Lee, S. Kim, H. Kim, S. Oh, G. Chung, K. Kang, *Chem. Mater.* **2012**, 24, 2692.
- [5] M. Diaz-lopez, P. A. Chater, Y. Joly, O. Proux, J. Hazemann, V. Pralong, *J. Mater. Chem. A* **2020**, 2, 10998.
